# Supplementary material for: Exposure to cigarette smoke precipitates simple hepatosteatosis to NASH in high-fat diet fed mice by inducing oxidative stress
Source: Oxford University Press journal article supplement (doi:10.1042/cs20210628), 2021-08-24
Supplement: cs-2021-0628_supp.pdf [file cs-2021-0628_supp.pdf]

## Supplementary Data

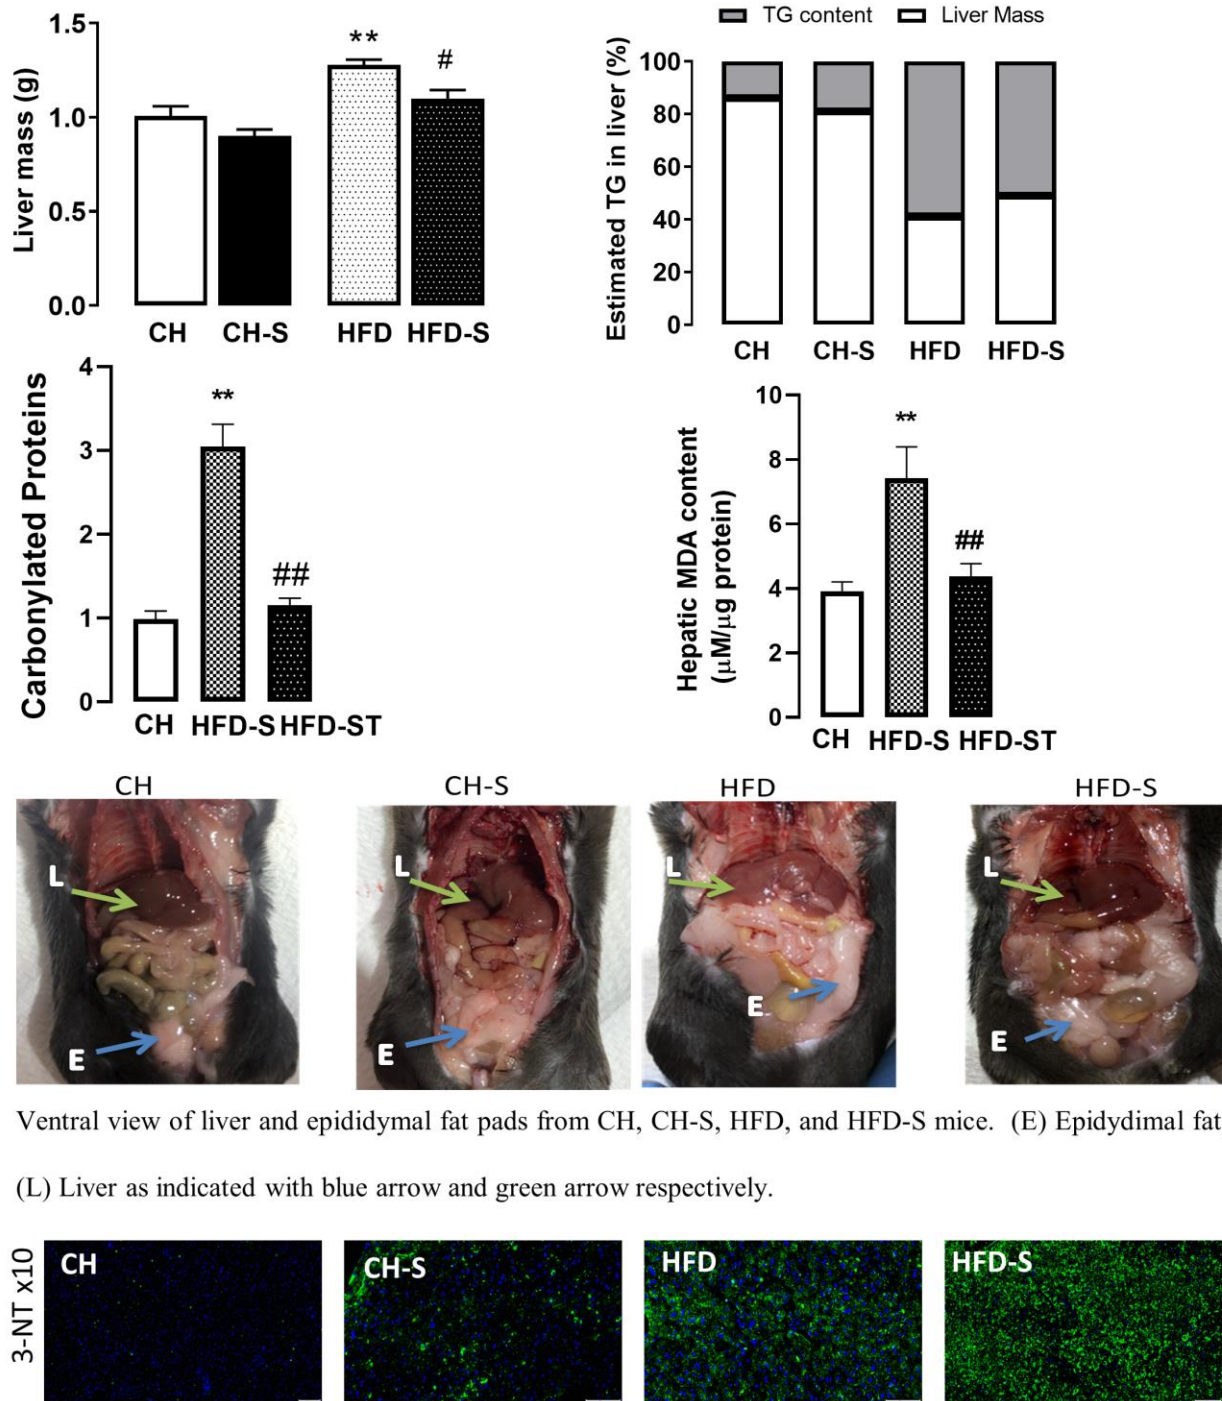

Ventral view of liver and epididymal fat pads from CH, CH-S, HFD, and HFD-S mice. (E) Epididymal fat, (L) Liver as indicated with blue arrow and green arrow respectively.

3-NT staining at 10x magnification. Smoke alone induced an increase in 3-NT expression along with HFD-feeding. The combined group induced a much higher rise in expression of 3-NT consistent with macrophage infiltration was markedly increased in this mice group compared to HFD alone.
